# Supplementary material
Source: publisher figshare collection journal article supplement (https://acs.figshare.com/ndownloader/files/6837633)
Supplement: Supplementary file 1 [file 6837633]

## Supporting Information

### **Cyclometalated Platinum(II) Complexes of 1,3-Bis(1-*n*-butylpyrazol-3-yl)benzenes: Synthesis, Characterization, Electrochemical, Photophysical, and Gelation Behavior Studies**

Yeye Ai,<sup>[a,b]</sup> Yongguang Li,<sup>\*,[a]</sup> Huiqing Ma,<sup>[a]</sup> Cheng-Yong Su,<sup>[a]</sup> Vivian Wing-Wah Yam<sup>\*,[a,b]</sup>

*[a] Lehn Institute of Functional Materials, School of Chemistry, Sun Yat-Sen University, Guangzhou 510275, (P. R. China)*

*[b] Institute of Molecular Functional Materials [Areas of Excellence Scheme, University Grants Committee (Hong Kong)] and Department of Chemistry, The University of Hong Kong, Pokfulam Road (Hong Kong)*

Fax: (+)(852) 2857-1586; E-mail: liyongguang@mail.sysu.edu.cn; wwyam@hku.hk

## Experimental section

**General.** All starting materials were obtained from commercial suppliers and were used as received. 1,3-Diacetylbenzene, 4-iodoaniline, 2-propynylamine, 1-bromobutane, and trimethylsilylacetylene were purchased from Aladdin Industrial Co. *N,N*-Dimethylformamide dimethyl acetal,  $K_2PtCl_4$ , and 4-methoxyphenylacetylene were obtained from Energy Chemical. 4-Nitrophenylacetylene was supplied by Bide Pharmatech Ltd. Hydrazine hydrate was provided from J&K Scientific Ltd. 1-Bromohexadecane was supplied by Beijing HWRK Chen Co. Cholesteryl chloroformate (99%) was purchased from Alfa Aesar. Cholesteryl 4-ethynylphenyl carbamate and cholesteryl 2-propyn-1-yl carbamate were synthesized according to literature-reported procedures.<sup>1</sup> 1,3-Di(1*H*-pyrazol-3-yl)benzene, 1,3-bis(1-*n*-butyl-1*H*-pyrazol-3-yl)benzene, 1,3-bis(1-*n*-hexadecanyl-1*H*-pyrazol-3-yl)benzene, cholesterol acid amide phenylacetylene, and complexes **1** and **2** were synthesized according to modifications of the methods described in the literature.<sup>2</sup>

## Physical measurements and instrumentation

<sup>1</sup>H NMR spectra were recorded on a Bruker DPX 400 FT-NMR spectrometer (400 MHz) at 298 K. Electrospray ionization mass spectra were performed on a Bruker Maxis 4G ESI-Q-TOF using electrospray ionization (positive ion mode: ESI) in acetonitrile or methanol solution. Elemental analyses of the complexes were performed on a Vario EL elemental analyzer at the instrumental analysis & research center, Sun Yat-Sen University, Guangzhou, China.

Electronic absorption spectra were recorded using a Shimadzu UV-3600 spectrophotometer. The photoluminescence spectra were measured on Edinburgh FS 5 or FLS 980 fluorescence

spectrophotometer. All solutions for photophysical studies were prepared under high vacuum in a 10 cm<sup>3</sup> round-bottomed flask equipped with a sidearm 1 cm fluorescence cuvette and sealed from the atmosphere by a Rotaflo HP6/6 quick-release Teflon stopper. Solutions were rigorously degassed on a high-vacuum line in a two-compartment cell with no less than five successive freeze-pump-thaw cycles. Solid-state photophysical measurements were carried out with the solid sample loaded on a quartz glass slide. Liquid nitrogen was placed into the Dewar flask for low temperature (77 K) photophysical measurements. CD measurements were recorded using a Jasco (Tokyo, Japan) J-810 CD spectropolarimeter with the metallo gel sealed in a 10×1 mm quartz cell. Scanning electron microscope experiments were performed by using Thermal Field Emission Environmental Scanning Electron Microscope (ESEM) on Quanta 400F or Sigma 300/VP. The SEM sample was prepared by dropping dilute gels onto a silicon wafer. Slow evaporation of solvents in air for at least two days led to xerogels. The digital photographs of metallo gels were taken by Sony ILCE-7. Cyclic voltammetric measurements were performed by using a CH Instruments, Inc. model CHI 760 E electrochemical analyzer using a three-electrode single-cell compartment in a dichloromethane solution with 0.1 M <sup>n</sup>Bu<sub>4</sub>PF<sub>6</sub> as supporting electrolyte at room temperature. The reference electrode was an Ag/AgNO<sub>3</sub> (0.1 mol dm<sup>-3</sup> in acetonitrile) electrode and the working electrode was a glassy carbon electrode (Gaossunion, Inc.) with a platinum wire as the counter electrode. The working electrode surface was first polished with a 1 μm alumina slurry (Gaossunion, Inc.) on a microcloth (Gaossunion, Inc.) and then with a 0.3 μm alumina slurry (Gaossunion, Inc.). It was then rinsed with ultra-pure deionized water and sonicated in a beaker containing ultra-pure water for 3 times. The working electrode was finally rinsed under a stream of ultra-pure deionized water. The ferrocenium / ferrocene couple (FeCp<sub>2</sub><sup>+0</sup>) was used as the internal reference.<sup>3</sup> All solutions for electrochemical

studies was degassed with pre-purified argon prior measurements.

**Crystal structure determination.** Single-crystal diffraction data of complex **1** and **5** were collected on an Agilent SuperNova X-ray diffractometer using micro-focus dual with X-ray Source of Cu–K $\alpha$  radiation ( $\lambda = 1.54178 \text{ \AA}$ ) at 293 K and 150 K respectively. Using Olex2<sup>4</sup> the structure was solved with the ShelXS<sup>5</sup> structure solution program using direct methods and refined with the XL<sup>5</sup> refinement package using least squares minimization.

**Gelation test:** The gelator and the solvent were placed in a screw-capped sample vial and the mixture was heated until the solid dissolved. The sample vial was cooled in atmospheric air, and was then left for 1 min at room temperature. The state of the materials was evaluated by the “stable-to-inversion of a test tube” method.

### Synthetic methods and characterization:

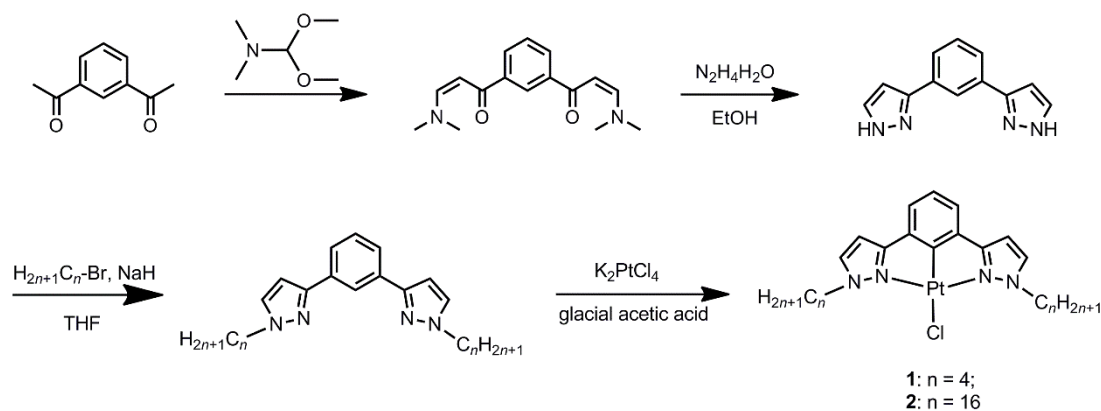

**Scheme S1.** Synthetic routes of bpzb ligands and complexes **1–2**.

**Synthesis of 1,3-di(1*H*-pyrazol-3-yl)benzene:** A mixture of 1,1'-(1,3-phenylene)bis(3-(dimethylamino)prop-2-en-1-one) (150 mg, 0.55 mmol),  $\text{N}_2\text{H}_4 \cdot \text{H}_2\text{O}$  (0.39 mL, 8.25 mmol) and ethanol (3 mL) was heated at 70°C overnight. After cooling to room temperature, acetone was added to quench the excess  $\text{N}_2\text{H}_4 \cdot \text{H}_2\text{O}$ . Removal of the solvent under reduced pressure afforded the crude product. The pure product was obtained after washing with acetone / water (1:1 v / v; 50 mL). Yield: 115 mg, 85 %;  $^1\text{H}$  NMR (400 MHz,  $[\text{D}_6]\text{DMSO}$ , 298 K):  $\delta$  = 6.78 (d,  $J$  = 2.0 Hz, 2H; pyrazolyl proton), 7.45 (t,  $J$  = 7.7 Hz, 1H; phenyl proton), 7.73–7.75 (m, 4H; phenyl and pyrazolyl proton), 8.23 (s, 1H; phenyl proton), 12.93 ppm (br s, 2H; pyrazolyl proton); MS (ESI<sup>+</sup>):  $m/z$ : 211.11  $[M+\text{H}]^+$ .

**Synthesis of 1,3-bis(1-*n*-butylpyrazol-3-yl)benzene:** NaH (1.67 g, 41.1 mmol) and 1-bromobutane (7 mL, 51.4 mmol) were added to the solution of 1,3-di(1*H*-pyrazol-3-yl)benzene (2.16 g, 10.3 mmol) in THF (100 mL), and the mixture was heated at 70°C for 2 days under  $\text{N}_2$ . After removal of the solvents, the organic phase was washed with deionized water (3 times) and dried over anhydrous  $\text{MgSO}_4$ . Removal of the solvent under reduced pressure afforded the crude

product, which was purified by column chromatography on silica gel using dichloromethane-ethyl acetate (1:1 v / v) as the eluent to give the desired product as a yellow oil. Yield: 2.24 g, 68 %;  $^1\text{H}$  NMR (400 MHz,  $\text{CDCl}_3$ , 298 K, relative to  $\text{Me}_4\text{Si}$ ):  $\delta$  = 0.96 (t,  $J$  = 4 Hz, 6H;  $-\text{CH}_3$ ), 1.33–1.42 (m, 4H;  $-\text{CH}_2-\text{CH}_3$ ), 1.86–1.94 (m, 4H;  $-\text{CH}_2-\text{CH}_2\text{CH}_3$ ), 4.17 (t,  $J$  = 7.2 Hz, 4H;  $\text{N}-\text{CH}_2-$ ), 6.60 (d,  $J$  = 2.3 Hz, 2H; pyrazolyl proton), 7.39–7.42 (m, 3H; phenyl and pyrazolyl proton), 7.73–7.75 (m, 2H; phenyl proton), 8.17 ppm (t,  $J$  = 1.6 Hz, 1H; phenyl proton); MS ( $\text{ESI}^+$ ):  $m/z$ : 322.24 [ $M+\text{H}$ ] $^+$ .

**Synthesis of 1,3-bis(1-*n*-hexadecylpyrazilyl-3-yl)benzene:** The procedure was similar to that for 1,3-bis(1-*n*-butylpyrazilyl-3-yl)benzene, except 1-bromohexadecane (5.00 g, 16.34 mmol) was used in place of 1-bromobutane. The crude product was purified by column chromatography on silica gel using dichloromethane-ethyl acetate (50:1 v / v) as the eluent to give the desired product as a white solid. Yield: 2.00 g, 77 %;  $^1\text{H}$  NMR (400 MHz,  $[\text{D}_6]\text{DMSO}$ , 298 K, relative to  $\text{Me}_4\text{Si}$ ):  $\delta$  = 0.84 (t,  $J$  = 6.8 Hz, 6H;  $-\text{CH}_3$ ), 1.15–1.41 (m, 52H;  $-(\text{CH}_2)_{13}-\text{CH}_3$ ), 1.78–1.83 (m, 4H;  $\text{N}-\text{CH}_2-\text{CH}_2-$ ), 4.13 (t,  $J$  = 7.0 Hz, 4H;  $\text{N}-\text{CH}_2-$ ), 6.70 (d,  $J$  = 2.2 Hz, 2H; pyrazolyl proton), 7.38 (t,  $J$  = 7.7 Hz, 1H; phenyl proton), 7.65–7.67 (m, 2H; phenyl proton), 7.76 (d,  $J$  = 2.2 Hz, 2H; pyrazolyl proton), 8.21 ppm (s, 1H; phenyl proton); MS ( $\text{ESI}^+$ ):  $m/z$ : 659.62 [ $M$ ].

**Synthesis of complex 1:** 1,3-Bis(1-*n*-butyl-1*H*-pyrazol-3-yl)benzene (1 g, 2.40 mmol) and  $\text{K}_2\text{PtCl}_4$  (1 g, 2.40 mmol) were added into glacial acetic acid (15 mL). The mixture was heated to 108 °C for 5 days. Dark green solid was obtained after filtration and was washed with diethyl ether. Subsequent recrystallization by vapor diffusion of diethyl ether into a solution of the product in DMSO gave **1** as light green crystals. Yield: 1.33 g, 63 %;  $^1\text{H}$  NMR (400 MHz,  $\text{CDCl}_3$ , 298 K, relative to  $\text{Me}_4\text{Si}$ ):  $\delta$  = 0.95 (t,  $J$  = 7.4 Hz, 6H;  $-\text{CH}_3$ ), 1.34–1.43 (m, 4H;  $-\text{CH}_2-\text{CH}_3$ ), 1.89–1.96 (m, 4H;  $-\text{CH}_2-\text{CH}_2\text{CH}_3$ ), 4.89 (t,  $J$  = 7.1 Hz, 4H;  $\text{N}-\text{CH}_2-$ ), 6.46 (d,  $J$  = 2.7 Hz, 2H; pyrazolyl proton),

7.10–7.18 (m, 3H; phenyl and pyrazolyl proton), 7.41 ppm (d,  $J = 2.7$  Hz, 2H; phenyl proton); MS (ESI<sup>+</sup>):  $m/z$  : 516.15 [ $M-Cl$ ]<sup>+</sup>; elemental analysis calcd (%) for C<sub>20</sub>H<sub>25</sub>ClN<sub>4</sub>Pt (**1**): C 43.52, H 4.57, N 10.15; found: C 43.41, H 4.43, N 10.12.

**Synthesis of complex 2:** The procedure was similar to that for **1**, except 1,3-bis(1-*n*-hexadecylpyrazilyl-3-yl)benzene (1.03 g, 1.57 mmol) was used in place of 1,3-bis(1-*n*-butylpyrazilyl-3-yl)benzene to give the product as a green solid. Subsequent recrystallization by vapor diffusion of diethyl ether into a solution of the product in dichloromethane gave **2** as a pale green solid. Yield: 447 mg, 42 %; <sup>1</sup>H NMR (400 MHz, CDCl<sub>3</sub>, 298 K, relative to Me<sub>4</sub>Si):  $\delta$  = 0.87 (t,  $J = 6.8$  Hz, 6H;  $-CH_3$ ), 1.23–1.32 (m, 52H;  $-(CH_2)_{13}-CH_3$ ), 1.90–1.97 (m, 4H; N-CH<sub>2</sub>-CH<sub>2</sub>-), 4.87 (t,  $J = 7.2$  Hz, 4H; N-CH<sub>2</sub>-), 6.46 (d,  $J = 2.7$  Hz, 2H; pyrazolyl proton), 7.10–7.18 (m, 3H; phenyl and pyrazolyl proton), 7.39–7.44 ppm (d,  $J = 2.7$  Hz, 2H; phenyl proton); MS (ESI<sup>+</sup>):  $m/z$  : 852.76 [ $M-Cl$ ]<sup>+</sup>; elemental analysis calcd (%) for C<sub>44</sub>H<sub>73</sub>ClN<sub>4</sub>Pt (**2**): C 59.52, H 8.23, N 6.31; found: C 59.48, H 8.30, N 6.10.

**Synthesis of complex 3:** Sodium hydroxide (14 mg, 0.36 mmol) was added into a well-stirred solution of phenylacetylene (0.036 mL, 0.36 mmol) in methanol (15 mL). After stirring for 30 min, complex **1** was added to the above reaction mixture. The mixture was stirred for 24 h at RT. The light yellow solid was obtained after filtration and washed with deionized water, methanol and *n*-hexane in succession. Subsequent recrystallization by vapor diffusion of diethyl ether into a solution of the product in dichloromethane gave **3** as a light yellow solid. Yield: 73 mg, 62 %. <sup>1</sup>H NMR (400 MHz, CDCl<sub>3</sub>, 298 K, relative to Me<sub>4</sub>Si):  $\delta$  = 0.87 (t,  $J = 7.4$  Hz, 6H;  $-CH_3$ ), 1.24–1.34 (m, 4H;  $-CH_2-CH_3$ ), 1.92–1.99 (m, 4H;  $-CH_2-CH_2CH_3$ ), 4.96 (t,  $J = 7.0$  Hz, 4H; N-CH<sub>2</sub>-), 6.46 (d,  $J = 2.7$  Hz, 2H; pyrazolyl proton), 7.09–7.14 (m, 2H; phenyl and pyrazolyl proton), 7.23–7.25 (m,

3H; phenyl proton), 7.38–7.40 ppm (m, 5H; phenyl and pyrazolyl proton); MS (ESI<sup>+</sup>):  $m/z$  : 617.21 [ $M$ ]<sup>+</sup>; 516.18 [ $M$ -alkynyl]<sup>+</sup>; elemental analysis calcd (%) for C<sub>28</sub>H<sub>30</sub>N<sub>4</sub>Pt (**3**): C 54.45, 4.90, 9.07; found: C 54.14, H 4.79, N 9.06.

**Synthesis of complex 4:** The procedure was similar to that for complex **3**, except 4-methoxyphenylacetylene (48 mg, 0.36 mmol) was used in place of phenylacetylene to give the product as a yellow solid. Subsequent recrystallization by vapor diffusion of diethyl ether into a solution of the product in dichloromethane gave **4** as yellow crystals. Yield: 107 mg, 91 %; <sup>1</sup>H NMR (400 MHz, [D<sub>6</sub>]DMSO, 298 K):  $\delta$  = 0.83 (t,  $J$  = 7.3 Hz, 6H;  $-CH_3$ ), 1.20–1.25 (m, 4H;  $-CH_2-CH_3$ ), 1.80–1.88 (m, 4H;  $-CH_2-CH_2CH_3$ ), 3.74 (s, 3H;  $-OCH_3$ ), 4.96 (t,  $J$  = 6.8 Hz, 4H; N- $CH_2-$ ), 6.67 (d,  $J$  = 1.6 Hz, 2H; pyrazolyl proton), 6.85 (d,  $J$  = 8.2 Hz, 2H; phenyl proton), 7.10 (t,  $J$  = 7.5 Hz, 1H; phenyl proton), 7.18 (d,  $J$  = 8.2 Hz, 2H; phenyl proton), 7.34 (d,  $J$  = 7.5 Hz, 2H; phenyl proton), 8.01 ppm (d,  $J$  = 1.6 Hz, 2H; pyrazolyl proton); MS (ESI<sup>+</sup>):  $m/z$  : 647.23 [ $M$ ]<sup>+</sup>; 516.78 [ $M$ -alkynyl]<sup>+</sup>; elemental analysis calcd (%) for C<sub>29</sub>H<sub>32</sub>N<sub>4</sub>OPt (**4**): C 53.78, H 4.98, N 8.65; found: C 54.14, H 4.79, N 9.06.

**Synthesis of complex 5:** The procedure was similar to that for complex **3**, except 4-nitrophenylacetylene (79 mg, 0.36 mmol) was used in place of phenylacetylene to give the product as an orange solid. Subsequent recrystallization by vapor diffusion of diethyl ether into a solution of the product in dichloromethane gave **5** as orange crystals. Yield: 112 mg, 93 %; <sup>1</sup>H NMR (400 MHz, [D<sub>6</sub>]DMSO, 298 K):  $\delta$  = 0.83 (t,  $J$  = 7.2 Hz, 6H;  $-CH_3$ ), 1.14–1.23 (m, 4H;  $-CH_2-CH_3$ ), 1.79–1.87 (m, 4H;  $-CH_2-CH_2CH_3$ ), 4.96 (t,  $J$  = 6.9 Hz, 4H; N- $CH_2-$ ), 6.67 (d,  $J$  = 0.8 Hz, 2H; pyrazolyl proton), 7.12 (t,  $J$  = 7.5 Hz, 1H; phenyl proton), 7.36 (d,  $J$  = 7.5 Hz, 2H; phenyl proton), 7.45 (d,  $J$  = 8.3 Hz, 2H; phenyl proton), 8.05 (d,  $J$  = 1.6 Hz, 2H; pyrazolyl proton), 8.16



ppm (d,  $J = 8.3$  Hz, 2H; phenyl proton); MS (ESI<sup>+</sup>):  $m/z$  : 663.19 [ $M$ ]<sup>+</sup>, 516.16 [ $M$ -alkynyl]<sup>+</sup>; elemental analysis calcd (%) for C<sub>28</sub>H<sub>29</sub>N<sub>5</sub>O<sub>2</sub>Pt (**5**·H<sub>2</sub>O·0.5C<sub>6</sub>H<sub>14</sub>): C 51.45, H 5.26, N 9.68; found: C 51.69, H 4.91, N 9.49.

**Synthesis of complex 6:** The procedure was similar to that for complex **3**, except 4-ethynylaniline (35 mg, 0.36 mmol) was used in place of phenylacetylene to give the product as a pale yellow solid. Subsequent recrystallization by vapor diffusion of diethyl ether into a solution of the product in dichloromethane gave **6** as a brown solid. Yield: 100 mg, 87 %; <sup>1</sup>H NMR (400 MHz, CDCl<sub>3</sub>, 298 K, relative to Me<sub>4</sub>Si):  $\delta$  = 0.88 (t,  $J = 7.4$  Hz, 6H;  $-CH_3$ ), 1.26–1.35 (m, 4H;  $-CH_2-CH_3$ ), 1.91–1.99 (m, 4H;  $-CH_2-CH_2CH_3$ ), 3.61 (s, 2H;  $-NH_2$ ), 5.00 (t,  $J = 7.0$  Hz, 4H; N- $CH_2-$ ), 6.45 (d,  $J = 2.7$  Hz, 2H; pyrazolyl proton), 6.60 (d,  $J = 8.5$  Hz, 2H; phenyl proton), 7.10 (t,  $J = 7.5$  Hz, 1H; phenyl proton), 7.20–7.26 (m, 4H; phenyl proton), 7.38 ppm (d,  $J = 2.7$  Hz, 2H; pyrazolyl proton); MS (ESI<sup>+</sup>):  $m/z$  : 632.24 [ $M$ ]<sup>+</sup>, 516.18 [ $M$ -alkynyl]<sup>+</sup>; elemental analysis calcd (%) for C<sub>28</sub>H<sub>31</sub>N<sub>5</sub>Pt (**6**·0.5H<sub>2</sub>O): C 52.41, H 5.03, N 10.91; found: C 52.42, H 4.82, N 10.83.

**Synthesis of complex 7:** The procedure was similar to that for complex **3**, except cholesteryl 4-ethynylphenyl carbamate (192 mg, 0.36 mmol) was used in place of phenylacetylene to give the product as a pale yellow solid. Subsequent recrystallization by vapor diffusion of diethyl ether into a solution of the product in dichloromethane gave **7** as a pale yellow solid. Yield: 174 mg, 92 %; <sup>1</sup>H NMR (400 MHz, CDCl<sub>3</sub>, 298 K, relative to Me<sub>4</sub>Si):  $\delta$  = 0.68 (s, 3H; cholesteryl proton), 0.86–1.54 (m, 43 H; cholesteryl proton,  $-CH_2-CH_3$  and  $-(CH_3)_2$ ), 1.78–2.03 (m, 9 H; cholesteryl proton and  $-CH_2-CH_2CH_3$ ), 2.31–2.46 (m, 2H; cholesteryl proton), 4.56–4.64 (m, 1H,  $-OCH-$  on cholesteryl proton), 4.96 (t,  $J = 7.0$  Hz, 4H; N- $CH_2-$ ), 5.40 (s, 1H,  $-CH=C-$  on cholesteryl), 6.45–6.48 (m, 3H; pyrazolyl proton and  $-NH-$ ), 7.11 (t,  $J = 7.5$  Hz, 1H; phenyl proton), 7.24–7.45 ppm (m, 8H; phenyl

and pyrazolyl proton); MS (ESI<sup>+</sup>):  $m/z$  : 516.18 [ $M$ -alkynyl]<sup>+</sup>; elemental analysis calcd (%) for C<sub>56</sub>H<sub>75</sub>N<sub>5</sub>O<sub>2</sub>Pt (**7**): C 64.34, H 7.23, N 6.70; found: C 64.55, H 7.30, N 6.46.

**Synthesis of complex 8:** The procedure was similar to that for complex **3**, except cholesteryl 2-propyn-1-yl carbamate (197 mg, 0.36 mmol) was used in place of phenylacetylene to give the product as a pale yellow solid. Subsequent recrystallization by vapor diffusion of diethyl ether into a solution of the product in dichloromethane gave **8** as a light yellow solid. Yield: 113 mg, 63 %; <sup>1</sup>H NMR (400 MHz, CDCl<sub>3</sub>, 298 K, relative to Me<sub>4</sub>Si):  $\delta$  = 0.68 (s, 3H; cholesteryl proton), 0.86–1.60 (m, 43 H; cholesteryl proton,  $-CH_2-CH_3$  and  $-(CH_3)_2$ ), 1.78–2.02 (m, 9 H; cholesteryl proton and  $-CH_2-CH_2CH_3$ ), 2.25–2.39 (m, 2H; cholesteryl proton), 4.26 (d,  $J$  = 4.5 Hz, 2H;  $-NH-CH_2-$ ), 4.45–4.51 (m, 1H,  $-OCH-$  on cholesteryl proton), 4.75 (s, 1H;  $-NH-$ ), 4.92 (t,  $J$  = 7.1 Hz, 4H;  $-N-CH_2-$ ), 5.38 (s, 1H,  $-CH=C-$  on cholesteryl), 6.44 (d,  $J$  = 2.7 Hz, 2H; pyrazolyl proton), 7.10 (t,  $J$  = 7.5 Hz, 1H; phenyl proton), 7.22–7.25 (d,  $J$  = 7.5 Hz, 2H; phenyl proton), 7.38 ppm (d,  $J$  = 2.7 Hz, 2H; pyrazolyl proton); MS (ESI<sup>+</sup>):  $m/z$  : 516.34 [ $M$ -alkynyl]<sup>+</sup>; elemental analysis calcd (%) for C<sub>51</sub>H<sub>73</sub>N<sub>5</sub>O<sub>2</sub>Pt (**8**): C 62.30, H 7.48, N 7.12; found: C 61.93, H 7.54, N 6.96.

**Synthesis of complex 9:** The procedure was similar to that for complex **3**, except cholesteryl 4-ethynylphenyl carbamate (119 mg, 0.22 mmol) and complex **2** were used in place of phenylacetylene and complex **1** respectively in methanol and CH<sub>2</sub>Cl<sub>2</sub> mixed solvent (1:1 v / v; 30 mL) under N<sub>2</sub> atmosphere. The mixture was stirred for 24 h at RT. After evaporation of most solvent and filtration, the crude product was washed with deionized water, methanol and *n*-hexane in succession. Subsequent recrystallization by vapor diffusion of diethyl ether into a solution of the product in dichloromethane gave **9** as a light yellow solid. Yield: 131 mg, 84 %. <sup>1</sup>H NMR (400 MHz, CDCl<sub>3</sub>, 298 K, relative to Me<sub>4</sub>Si):  $\delta$  = 0.68 (s, 3H; cholesteryl proton), 0.86–1.52 (m, 91 H;

cholesteryl proton,  $-(CH_2)_{13}-CH_3$  and  $-(CH_3)_2$ , 1.79–2.03 (m, 9 H; cholesteryl proton and  $-CH_2-CH_2CH_3$ ), 2.30–2.45 (m, 2H; cholesteryl proton), 4.46–4.64 (m, 1H,  $-OCH-$  on cholesteryl proton), 4.93 (t,  $J = 7.1$  Hz, 4H;  $-N-CH_2-$ ), 5.41 (s, 1H,  $-CH=C-$  on cholesteryl), 6.45–6.47 (m, 3H; pyrazolyl proton and  $-NH-$ ), 7.11 (t,  $J = 7.5$  Hz, 1H; phenyl proton), 7.24–7.38 ppm (m, 8H; phenyl and pyrazolyl proton); MS (ESI<sup>+</sup>):  $m/z$  : 852.76 [ $M$ -alkynyl]<sup>+</sup>; elemental analysis calcd (%) for C<sub>80</sub>H<sub>123</sub>N<sub>5</sub>O<sub>2</sub>Pt (**9**): C 69.53, H 8.97, N 5.07; found: C 69.45, H 9.02, N 4.77.

**Synthesis of complex 10:** The procedure was similar to that for complex **9**, except cholesteryl 2-propyn-1-yl carbamate (119 mg, 0.22 mmol) and complex **2** were used in place of cholesteryl 4-ethynylphenyl carbamate and complex **1** respectively to give the product as a light yellow solid. Subsequent recrystallization by vapor diffusion of diethyl ether into a solution of the product in dichloromethane gave **10** as a pale yellow solid. Yield: 119 mg, 80 %. <sup>1</sup>H NMR (400 MHz, CDCl<sub>3</sub>, 298 K, relative to Me<sub>4</sub>Si):  $\delta$  = 0.67 (s, 3H; cholesteryl proton), 0.85–1.53(m, 91H; cholesteryl proton,  $-(CH_2)_{13}-CH_3$  and  $-(CH_3)_2$ ), 1.82–2.02 (m, 9 H; cholesteryl proton and  $-CH_2-CH_2CH_3$ ), 2.24–2.38 (m, 2H; cholesteryl proton), 4.25 (d,  $J = 2.6$  Hz, 2H;  $-CH_2C\equiv C-$ ), 4.46–4.53 (m, 1H,  $-OCH-$  on cholesteryl proton), 4.75 (s, 1H;  $-NH-$ ), 4.89 (t,  $J = 6.7$  Hz, 4H;  $-N-CH_2-$ ), 5.37 (s, 1H,  $-CH=C-$  on cholesteryl), 6.43 (d,  $J = 2.7$  Hz, 2H; pyrazolyl proton), 7.09 (t,  $J = 7.5$  Hz, 1H; phenyl proton), 7.21–7.25 (d,  $J = 7.5$  Hz, 2H; phenyl proton), 7.38 ppm (d,  $J = 2.7$  Hz, 2H; pyrazolyl proton); MS (ESI<sup>+</sup>):  $m/z$  : 852.76 [ $M$ -alkynyl]<sup>+</sup>; elemental analysis calcd (%) for C<sub>75</sub>H<sub>121</sub>N<sub>5</sub>O<sub>2</sub>Pt (**10**): C 68.25, H 9.24, N 5.31; found: C 68.16, H 9.34, N 5.01.

**Table S1.** Selected bond distances (Å ) and bond angles (deg) for complexes **1** and **5** with estimated standard deviations (e.s.d.s.) in parentheses.

| 1                |            | 5                 |            |
|------------------|------------|-------------------|------------|
| Bond Length [Å ] |            |                   |            |
| Pt(1)–N(2)       | 2.059(5)   | Pt(1)–N(2)        | 2.044(3)   |
| Pt(1)–N(3)       | 2.050(5)   | Pt(1)–N(3)        | 2.045(3)   |
| Pt(1)–Cl(1)      | 2.4162(15) | Pt(1)–C(21)       | 2.058(4)   |
| Pt(1)–C(9)       | 1.948(6)   | Pt(1)–C(9)        | 1.978(4)   |
|                  |            | C(21)–C(22)       | 1.208(6)   |
| Bond angles [°]  |            |                   |            |
| N(2)–Pt–C(9)     | 78.7(2)    | N(2)–Pt–C(9)      | 77.54(15)  |
| N(3)–Pt–C(9)     | 78.6(2)    | N(3)–Pt–C(9)      | 78.33(15)  |
| N(2)–Pt–N(3)     | 157.28(19) | N(2)–Pt–N(3)      | 155.85(13) |
| C(9)–Pt–Cl(1)    | 179.70(19) | C(9)–Pt–C(21)     | 177.40(15) |
|                  |            | Pt(1)–C(21)–C(22) | 175.3(3)   |

**Table S2.** Electrochemical data of complexes **1–10** and *p*-nitrophenylacetylene.

|                                | Oxidation                                      | Reduction                                |
|--------------------------------|------------------------------------------------|------------------------------------------|
|                                | $E_{\text{pa}} / \text{V vs SCE}^{[\text{a}]}$ | $E_{1/2} / \text{V vs SCE}^{[\text{a}]}$ |
| <b>1</b>                       | +1.15 <sup>[b]</sup>                           | — <sup>[c]</sup>                         |
| <b>2</b>                       | +1.14 <sup>[b]</sup>                           | — <sup>[c]</sup>                         |
| <b>3</b>                       | +0.87 <sup>[b]</sup>                           | — <sup>[c]</sup>                         |
| <b>4</b>                       | +0.84 <sup>[b]</sup>                           | — <sup>[c]</sup>                         |
| <b>5</b>                       | +1.07 <sup>[b]</sup>                           | −1.16 <sup>[d]</sup>                     |
| <b>6</b>                       | +1.03 <sup>[b]</sup>                           | — <sup>[c]</sup>                         |
| <b>7</b>                       | +0.86 <sup>[b]</sup>                           | — <sup>[c]</sup>                         |
| <b>8</b>                       | +0.96 <sup>[b]</sup>                           | — <sup>[c]</sup>                         |
| <b>9</b>                       | +1.05 <sup>[b]</sup>                           | — <sup>[c]</sup>                         |
| <b>10</b>                      | +0.93 <sup>[b]</sup>                           | — <sup>[c]</sup>                         |
| <i>p</i> -nitrophenylacetylene | — <sup>[e]</sup>                               | −0.97 <sup>[d]</sup>                     |

[a] In dichloromethane solution with 0.1 M  $n\text{Bu}_4\text{NPF}_6$  as supporting electrolyte at room temperature; scan rate 100 mV s<sup>−1</sup>;  $E_{1/2} = (E_{\text{pa}} + E_{\text{pc}})/2$ ;  $E_{\text{pa}}$  and  $E_{\text{pc}}$  are anodic peak and cathodic peak potentials.

[b] Irreversible oxidation waves. [c] No reduction waves were recorded within the solvent window.

[d] Quasi-reversible reduction waves. [e] No oxidation waves were recorded within the solvent window.

**Table S3.** Summary of gelation properties of complexes **7–10**.

| Solvents           | <b>7</b> | <b>8</b> | <b>9</b>                  | <b>10</b> |
|--------------------|----------|----------|---------------------------|-----------|
| Methanol           | P        | P        | P                         | P         |
| Ethanol            | P        | P        | P                         | P         |
| Cyclohexane        | P        | P        | CG <sup>[a]</sup> ( 2.6 ) | S         |
| Toluene            | S        | S        | S                         | S         |
| THF                | S        | S        | S                         | S         |
| Acetone            | S        | S        | P                         | P         |
| <i>i</i> -propanol | P        | P        | P                         | P         |
| <i>n</i> -butanol  | P        | P        | OG <sup>[a]</sup> ( 7.5 ) | P         |
| DMSO               | S        | S        | OG <sup>[a]</sup> ( 3.9 ) | P         |

[a] The values in parentheses are the critical gelation concentrations in mg mL<sup>-1</sup> at 25 °C. G = Gel;

OG = Opaque gel; P = Precipitation; S = Solution; CG = Clear gel.

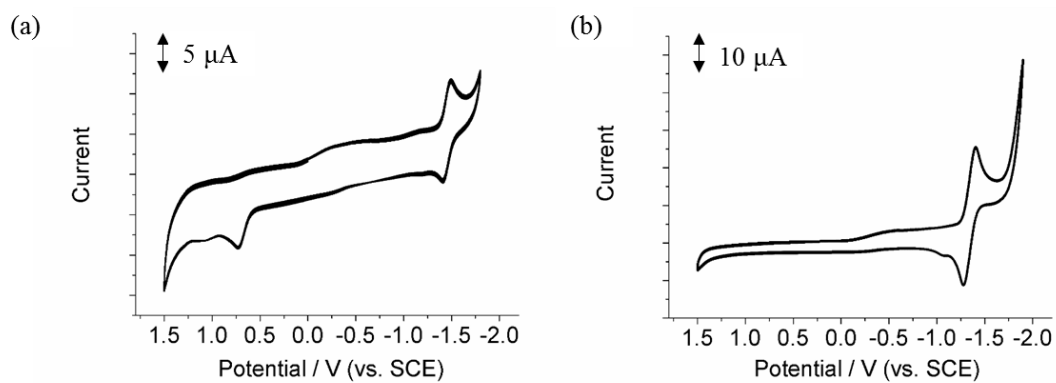

**Figure S1.** Cyclic voltammograms of (a) **5** and (b) *p*-nitrophenylacetylene ligand in  $\text{CH}_2\text{Cl}_2$  ( $0.1 \text{ mol dm}^{-3} \text{ } ^n\text{Bu}_4\text{NPF}_6$ ).

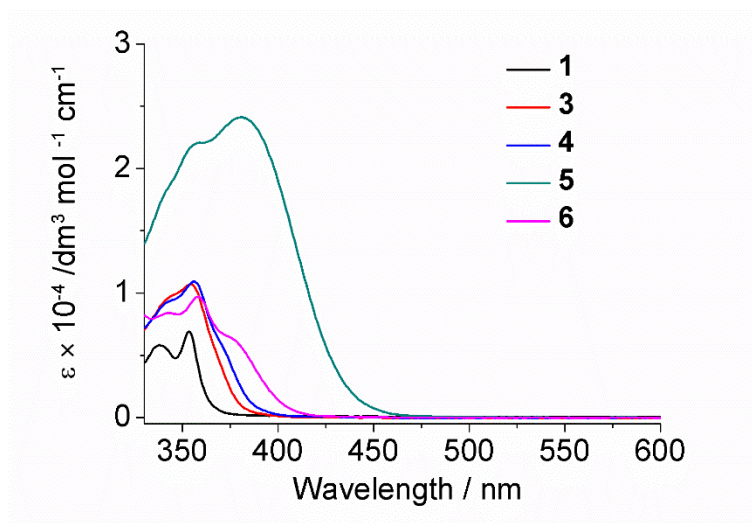

**Figure S2.** Electronic absorption spectra of complexes **1** and **3–6** in acetone at room temperature.

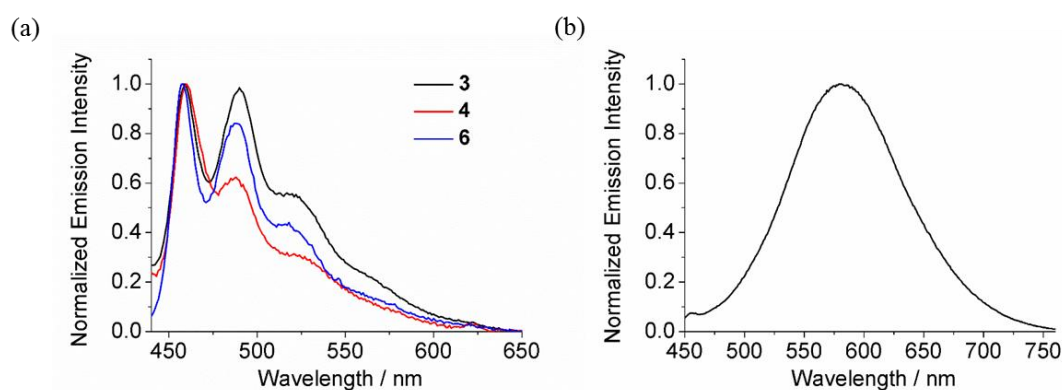

**Figure S3.** (a) Normalized emission spectra of complexes **3**, **4** and **6** in degassed dichloromethane solution at room temperature; (b) Normalized emission spectrum of complex **5** in degassed dichloromethane solution at room temperature.



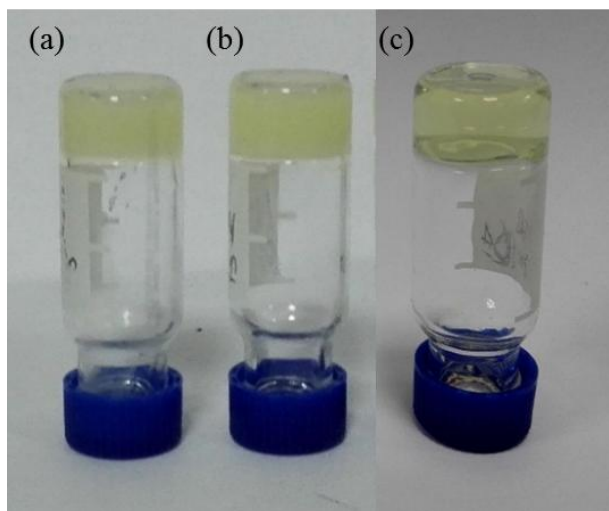

**Figure S4.** Photographs of metallogels of complex **9** in (a) *n*-butanol, (b) DMSO, and (c) cyclohexane.

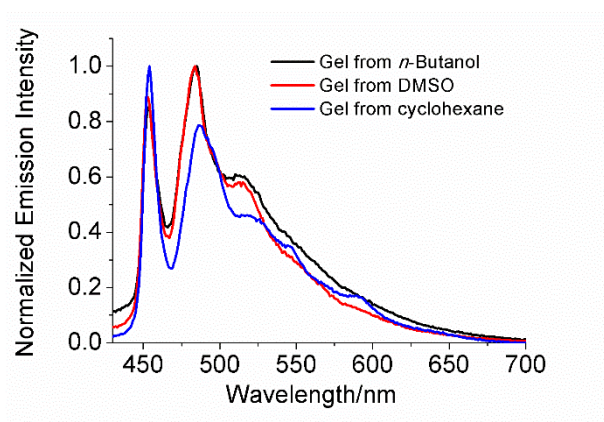

**Figure S5.** Normalized emission spectra of complex **9** in wet gel prepared from *n*-butanol, DMSO, cyclohexane.

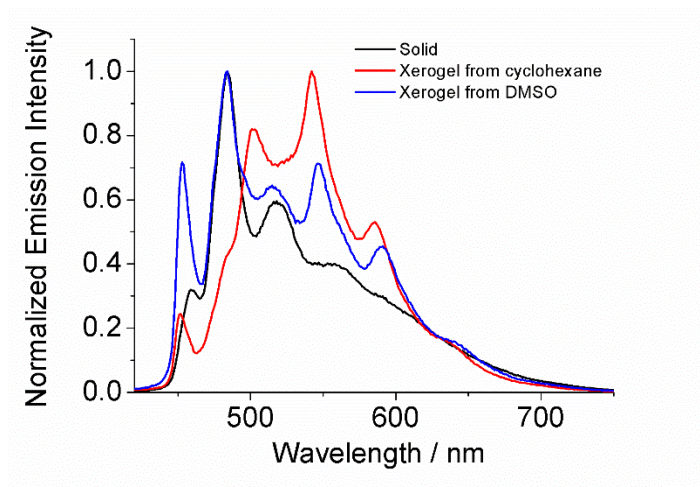

**Figure S6.** Normalized emission spectra of complex **9** in solid state and xerogel prepared from cyclohexane and DMSO.

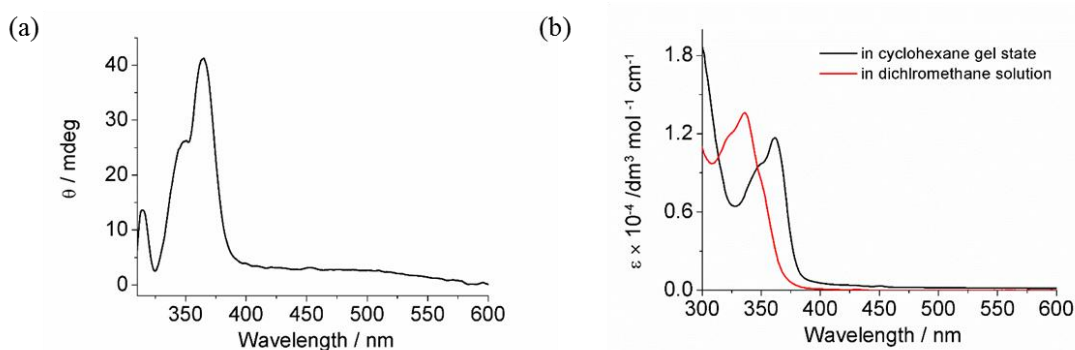

**Figure S7.** (a) CD spectra of the gel of complex **9** in cyclohexane at room temperature. (b) The electronic absorption spectra of complex **9** in cyclohexane gel state and dichloromethane solution at room temperature.

## References:

- (1) Li, Y. G.; Zhao, L.; Tam, A. Y.-Y.; K. Wong, M.-C.; Wu, L. X.; Yam, V. W.-W. Luminescent Amphiphilic 2,6-Bis(1,2,3-triazol-4-yl)pyridine Platinum(II) Complexes: Synthesis, Characterization, Electrochemical, Photophysical, and Langmuir–Blodgett Film-Formation Studies. *Chem. Eur. J.* **2013**, *19*, 14496–14505.
- (2) Baik, C.; Han, W. S.; Kang, Y. J.; Kang, S. O.; Ko, J. J. Synthesis and Photophysical Properties of Luminescent Platinum(II) Complexes with Terdentate Polypyridine Ligands: [Pt(bpqb)X] and [Pt(tbbpppy)X](PF<sub>6</sub>) (Bpqb-H = 1,3-Bis(4'-phenyl-2'-quinolinyl) Benzene; Tbbpppy = 4-*tert*-butyl-1,3-Bis(4'-phenyl-2'-quinolinyl)pyridine; X = Cl, C≡CC<sub>6</sub>H<sub>5</sub>, C≡CC<sub>6</sub>H<sub>4</sub>NMe<sub>2</sub>, C≡CC<sub>6</sub>H<sub>4</sub>NO<sub>2</sub>). *J. Organomet. Chem.* **2006**, *691*, 5900–5910.
- (3) Connelly, N. G.; Geiger, W. E. Chemical Redox Agents for Organometallic Chemistry. *Chem. Rev.* **1996**, *96*, 877–910.
- (4) Dolomanov, O. V.; Bourhis, L. J.; Gildea, R. J.; Howard, J. A. K.; Puschmann, H. OLEX2: a Complete Structure Solution, Refinement and Analysis Program. *J. Appl. Cryst.* **2009**, *42*, 339.
- (5) Sheldrick, G. M. A Short History of SHELX. *Acta Cryst.* **2008**, *A64*, 112.
